# Supplementary material
Source: HighWire-hosted journal article supplement (https://www.cmajopen.ca/highwire/filestream/81034/field_highwire_adjunct_files/0/open-2016-0117-1-at.pdf)
Supplement: open-2016-0117-1-at.pdf [file open-2016-0117-1-at.pdf]

**Appendix 1 (as supplied by the authors):**

**French- and English-Canadian versions of the minimum data set**

## Questionnaire à propos de la douleur au bas du dos

Ce dessin montre la région du corps à laquelle les prochaines questions s'appliquent

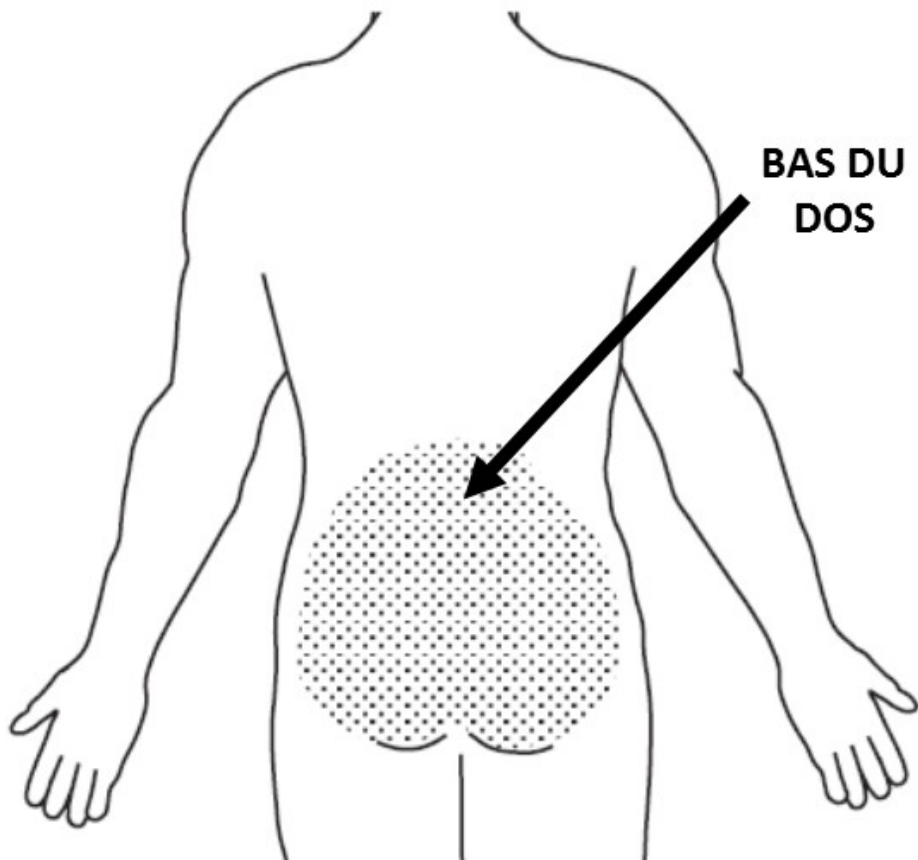

Depuis combien de temps la douleur au bas du dos est un problème pour vous?

- Moins d'un mois
- 1-2 mois
- 3-5 mois
- 6-11 mois
- 1-5 ans
- Plus de 5 ans

Au cours des 6 derniers mois, à quelle fréquence la douleur au bas du dos a été un problème pour vous?

- Tous les jours ou presque durant les 6 derniers mois
- Au moins la moitié des jours des 6 derniers mois
- Moins de la moitié des jours des 6 derniers mois

Au cours des 7 derniers jours, comment évaluez-vous votre douleur au bas du dos en moyenne?

0 = Aucune douleur

10 = La pire douleur imaginable

- 0  1  2  3  4  5  6  7  8  9  10

Au cours des 2 dernières semaines, est-ce que la douleur au bas du dos s'est propagée à votre/vos jambe(s)? (vous pouvez vous référer à la figure ci-dessous)

- Oui
- Non
- Incertain(e)

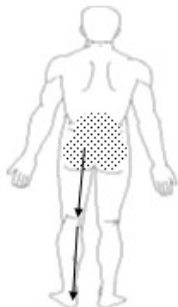

Au cours des 4 dernières semaines, à quel point avez-vous été dérangé(e) par ...

|                                                                                                                      | Pas du tout dérangé(e) | Légèrement dérangé(e) | Grandement dérangé(e) |
|----------------------------------------------------------------------------------------------------------------------|------------------------|-----------------------|-----------------------|
| Maux de ventre                                                                                                       | <input type="radio"/>  | <input type="radio"/> | <input type="radio"/> |
| Douleur dans vos bras, dans vos jambes ou dans vos articulations (autres que dans la région de la colonne ou du dos) | <input type="radio"/>  | <input type="radio"/> | <input type="radio"/> |
| Maux de tête                                                                                                         | <input type="radio"/>  | <input type="radio"/> | <input type="radio"/> |
| Douleur généralisée (douleur dans la majorité des régions de votre corps)                                            | <input type="radio"/>  | <input type="radio"/> | <input type="radio"/> |

Avez-vous déjà subi une chirurgie au bas du dos?

- Oui, une chirurgie
- Oui, plus d'une chirurgie
- Non

Si oui, à quand remonte votre dernière chirurgie au bas du dos?

- Il y a moins de 6 mois
- Il y a 6 mois ou plus, mais moins d'un an
- Il y a entre 1 et 2 ans
- Il y a plus de 2 ans

Est-ce qu'une de vos chirurgies au bas du dos impliquait une fusion des vertèbres (aussi appelée arthrodèse)?

- Oui
- Non
- Incertain(e)

## Perturbations causées par la douleur

Au cours des 7 derniers jours...

|                                                                                                                                           | Pas du tout           | Un peu                | Moyennement           | Beaucoup              | Énormément            |
|-------------------------------------------------------------------------------------------------------------------------------------------|-----------------------|-----------------------|-----------------------|-----------------------|-----------------------|
| Dans quelle mesure la douleur a-t-elle perturbé vos activités quotidiennes?                                                               | <input type="radio"/> | <input type="radio"/> | <input type="radio"/> | <input type="radio"/> | <input type="radio"/> |
| Dans quelle mesure la douleur a-t-elle perturbé les travaux d'entretien de la maison (ex. jardinage, rénovations)?                        | <input type="radio"/> | <input type="radio"/> | <input type="radio"/> | <input type="radio"/> | <input type="radio"/> |
| Dans quelle mesure la douleur a-t-elle perturbé votre capacité à participer à des activités sociales?                                     | <input type="radio"/> | <input type="radio"/> | <input type="radio"/> | <input type="radio"/> | <input type="radio"/> |
| Dans quelle mesure la douleur a-t-elle perturbé la réalisation de vos tâches ménagères (ex. nettoyage de la maison, passer l'aspirateur)? | <input type="radio"/> | <input type="radio"/> | <input type="radio"/> | <input type="radio"/> | <input type="radio"/> |

Avez-vous utilisé l'un des traitements suivants pour votre douleur au bas du dos?

|                                                                                                                                                              | Oui, j'utilise ce traitement actuellement | Oui, j'ai déjà utilisé ce traitement dans le passé, mais j'ai arrêté | Non                   | Incertain(e)          |
|--------------------------------------------------------------------------------------------------------------------------------------------------------------|-------------------------------------------|----------------------------------------------------------------------|-----------------------|-----------------------|
| Antidouleurs opioïdes (médicaments sur ordonnance tels que Codéine, Dilaudid, Duragesic, Fentanyl, Hydromorphone, Méthadone, Morphine, Oxycodone, Tramadol)? | <input type="radio"/>                     | <input type="radio"/>                                                | <input type="radio"/> | <input type="radio"/> |
| Infiltrations/Injections (telles que les injections épidurales de stéroïdes, injections facettaires)                                                         | <input type="radio"/>                     | <input type="radio"/>                                                | <input type="radio"/> | <input type="radio"/> |
| Programme d'exercices                                                                                                                                        | <input type="radio"/>                     | <input type="radio"/>                                                | <input type="radio"/> | <input type="radio"/> |
| Soutien psychologique (tel que la thérapie cognitivo-comportementale)                                                                                        | <input type="radio"/>                     | <input type="radio"/>                                                | <input type="radio"/> | <input type="radio"/> |

Les deux prochaines questions s'adressent aux personnes qui travaillent habituellement à l'extérieur de leur domicile

|                                                                                                                                                    | Oui                   | Non                   | Ne s'applique pas     |
|----------------------------------------------------------------------------------------------------------------------------------------------------|-----------------------|-----------------------|-----------------------|
| Je me suis absenté(e) du travail ou j'ai été sans emploi pendant au moins 1 mois en raison de la douleur au bas du dos                             | <input type="radio"/> | <input type="radio"/> | <input type="radio"/> |
| Je reçois ou j'ai fait une demande d'indemnisation pour invalidité parce que je suis incapable de travailler en raison de la douleur au bas du dos | <input type="radio"/> | <input type="radio"/> | <input type="radio"/> |

Capacité physique

|                                                                                                      | Sans aucune difficulté | Avec peu de difficultés | Avec quelques difficultés | Avec beaucoup de difficultés | En suis incapable     |
|------------------------------------------------------------------------------------------------------|------------------------|-------------------------|---------------------------|------------------------------|-----------------------|
| Êtes-vous capable d'effectuer des tâches régulières comme passer l'aspirateur ou faire du jardinage? | <input type="radio"/>  | <input type="radio"/>   | <input type="radio"/>     | <input type="radio"/>        | <input type="radio"/> |
| Êtes-vous capable de monter et descendre les escaliers à un rythme normal?                           | <input type="radio"/>  | <input type="radio"/>   | <input type="radio"/>     | <input type="radio"/>        | <input type="radio"/> |
| Êtes-vous capable d'aller marcher pendant au moins 15 minutes?                                       | <input type="radio"/>  | <input type="radio"/>   | <input type="radio"/>     | <input type="radio"/>        | <input type="radio"/> |
| Êtes-vous capable de faire des courses ou du shopping (magasinage)?                                  | <input type="radio"/>  | <input type="radio"/>   | <input type="radio"/>     | <input type="radio"/>        | <input type="radio"/> |

Détresse émotionnelle

Au cours des 7 derniers jours...

|                                    | Jamais                | Rarement              | Parfois               | Souvent               | Tout le temps         |
|------------------------------------|-----------------------|-----------------------|-----------------------|-----------------------|-----------------------|
| Je me suis senti(e) bon(ne) à rien | <input type="radio"/> | <input type="radio"/> | <input type="radio"/> | <input type="radio"/> | <input type="radio"/> |
| Je me suis senti(e) désemparé(e)   | <input type="radio"/> | <input type="radio"/> | <input type="radio"/> | <input type="radio"/> | <input type="radio"/> |
| Je me suis senti(e) déprimé(e)     | <input type="radio"/> | <input type="radio"/> | <input type="radio"/> | <input type="radio"/> | <input type="radio"/> |
| Je me suis senti(e) désespéré(e)   | <input type="radio"/> | <input type="radio"/> | <input type="radio"/> | <input type="radio"/> | <input type="radio"/> |

## Perturbations du sommeil

Au cours des 7 derniers jours...

|                                 | Très mauvaise         | Mauvaise              | Assez bonne           | Bonne                 | Très bonne            |
|---------------------------------|-----------------------|-----------------------|-----------------------|-----------------------|-----------------------|
| La qualité de mon sommeil était | <input type="radio"/> | <input type="radio"/> | <input type="radio"/> | <input type="radio"/> | <input type="radio"/> |

Au cours des 7 derniers jours...

|                              | Pas du tout           | Un peu                | Moyennement           | Beaucoup              | Énormément            |
|------------------------------|-----------------------|-----------------------|-----------------------|-----------------------|-----------------------|
| Mon sommeil a été réparateur | <input type="radio"/> | <input type="radio"/> | <input type="radio"/> | <input type="radio"/> | <input type="radio"/> |

Au cours des 7 derniers jours...

|                                | Pas du tout           | Un peu                | Moyennement           | Beaucoup              | Énormément            |
|--------------------------------|-----------------------|-----------------------|-----------------------|-----------------------|-----------------------|
| J'ai eu un problème de sommeil | <input type="radio"/> | <input type="radio"/> | <input type="radio"/> | <input type="radio"/> | <input type="radio"/> |
| J'ai eu du mal à m'endormir    | <input type="radio"/> | <input type="radio"/> | <input type="radio"/> | <input type="radio"/> | <input type="radio"/> |

Il n'est pas vraiment prudent pour une personne dans mon état d'être actif sur le plan physique.

- D'accord
- Pas d'accord

Je considère que ma douleur au bas du dos est épouvantable et j'ai l'impression que cela ne s'améliorera jamais.

- D'accord
- Pas d'accord

Êtes-vous impliqué(e) dans une poursuite ou réclamation légale liée à votre problème du bas du dos?

- Oui
- Non
- Incertain(e)

## Au cours de la dernière année...

|                                                                                                  | Jamais                | Rarement              | Parfois               | Souvent               |
|--------------------------------------------------------------------------------------------------|-----------------------|-----------------------|-----------------------|-----------------------|
| Avez-vous consommé de l'alcool ou des drogues plus que vous ne l'auriez voulu?                   | <input type="radio"/> | <input type="radio"/> | <input type="radio"/> | <input type="radio"/> |
| Avez-vous déjà voulu ou ressenti le besoin de réduire votre consommation d'alcool ou de drogues? | <input type="radio"/> | <input type="radio"/> | <input type="radio"/> | <input type="radio"/> |

Âge (0-120 ans) :

Genre :

- Femme
- Homme
- Inconnu
- Indéterminé

Origines raciales, ethniques ou culturelles (cochez plus d'une réponse s'il y a lieu) :

Êtes-vous autochtone, c'est-à-dire, Première Nation, Métis ou Inuk (Inuit)?

- Non, je ne suis pas autochtone
- Oui, Première Nation - Indien(ne) de l'Amérique du Nord
- Oui, Métis
- Oui, Inuk (Inuit)



## Êtes-vous?

- Blanc/Blanche
- Sud-Asiatique - ex. Indien(ne) de l'Inde, Pakistanais(e), Sri-Lankais(e)
- Chinois(e)
- Noir(e)
- Philippin(e)
- Latino-Américain(e)
- Arabe
- Asiatique du Sud-Est - ex. Vietnamien(ne), Cambodgien(ne), Malaisienne, Laotien(ne)
- Asiatique occidental(e) - ex. Iranien(ne), Afghan(e)
- Coréen(ne)
- Japonais(e)
- Autre :

(veuillez préciser)

## Situation d'emploi (cochez plus d'une réponse s'il y a lieu) :

- Travaille présentement à temps plein
- Travaille présentement à temps partiel
- À la recherche d'emploi, sans emploi
- Congé de maladie ou congé de maternité
- Invalidité temporaire ou permanente en raison de ma douleur au dos
- Invalidité pour d'autres raisons que la douleur au dos
- Étudiant
- Mise à pied temporaire
- Retraité(e)
- Au foyer
- Inconnu
- Autre :

(veuillez préciser)

Niveau de scolarité (sélectionnez le plus haut niveau atteint) :

- Sans diplôme d'études secondaires
- Diplôme d'études secondaires ou l'équivalent
- Certificat ou diplôme d'apprenti inscrit, d'une école de métiers ou d'un centre de formation professionnelle? (ex. coiffure, cuisine, électricien, charpenterie)
- Certificat ou diplôme d'études collégiales, d'un Cégep ou d'un autre établissement non universitaire (ex. technique de comptabilité, technique de génie industriel, adjoint juridique, DEC préuniversitaire, etc.)
- Diplôme ou grade universitaire inférieur au baccalauréat (ex. certificat)
- Baccalauréat (ex. B.A., B.Sc., B.Ed., LL.B.)
- Diplôme universitaire supérieur au baccalauréat (ex. D.E.S.S., microprogramme de 2e cycle)
- Maîtrise (ex. M.A., M.Sc., M.Ed., M.B.A.)
- Diplôme en médecine, en médecine dentaire, en médecine vétérinaire ou en optométrie (ex. M.D., D.D.S., D.M.D., D.M.V., doctorat de premier cycle)
- Doctorat (ex. Ph.D., D.Psy., D.Ed.)

Quel énoncé décrit le mieux vos habitudes par rapport à la cigarette?

- Je n'ai jamais fumé
- Je suis un fumeur
- J'ai déjà fumé, mais je ne fume plus

Taille :

En pieds/pouces (ex. 5'6) :

**OU**

En centimetres (cm) :

Poids :

En livres (lbs) :

**OU**

En kilogrammes (kg) :

## Questionnaire about low-back pain

This picture shows the part of the body referred to in the following questions

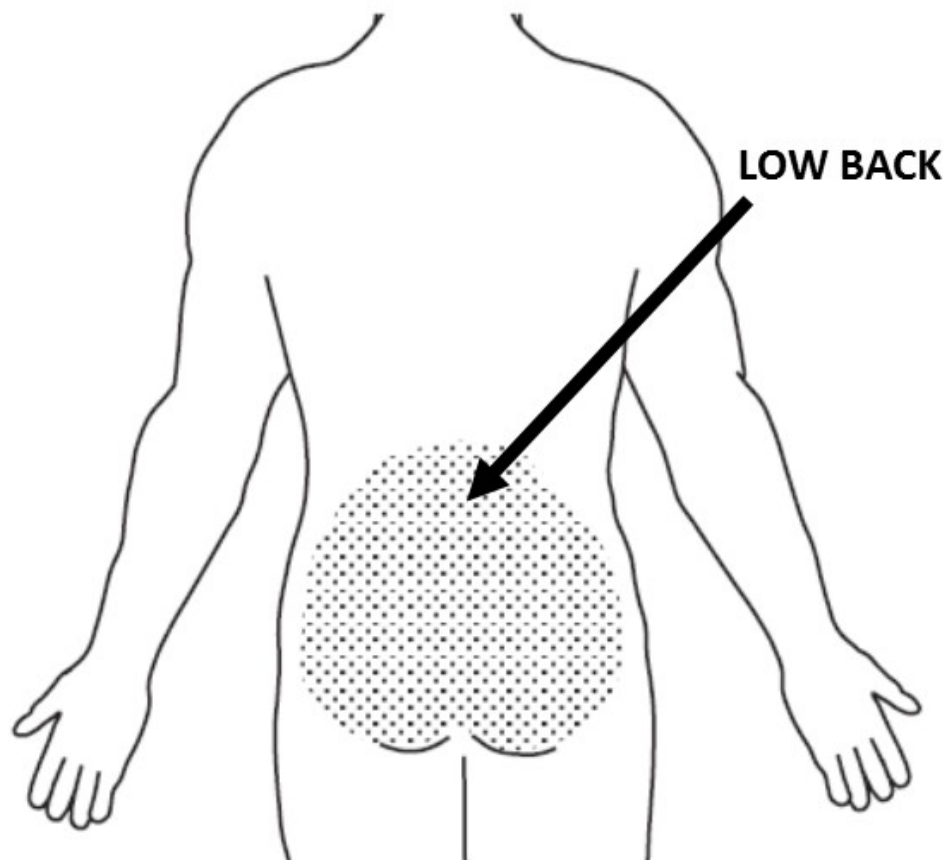

How long has low-back pain been an ongoing problem for you?

- Less than 1 month
- 1–2 months
- 3–5 months
- 6–11 months
- 1–5 years
- More than 5 years

How often has low-back pain been an ongoing problem for you over the past 6 months?

- Every day or nearly every day in the past 6 months
- At least half the days in the past 6 months
- Less than half the days in the past 6 months

In the past 7 days, how would you rate your low-back pain on average?

0 = No pain

10 = Worst imaginable pain

0  1  2  3  4  5  6  7  8  9  10

Has low-back pain spread down your leg(s) during the past 2 weeks?  
(you can refer to the figure below)

- Yes  
 No  
 Not sure

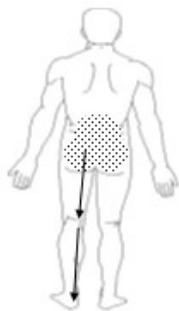

During the past 4 weeks, how much have you been bothered by...

|                                                                    | Not bothered at all   | Bothered a little     | Bothered a lot        |
|--------------------------------------------------------------------|-----------------------|-----------------------|-----------------------|
| Stomach pain                                                       | <input type="radio"/> | <input type="radio"/> | <input type="radio"/> |
| Pain in your arms, legs, or joints (other than your spine or back) | <input type="radio"/> | <input type="radio"/> | <input type="radio"/> |
| Headaches                                                          | <input type="radio"/> | <input type="radio"/> | <input type="radio"/> |
| Widespread pain (pain in most of your body)                        | <input type="radio"/> | <input type="radio"/> | <input type="radio"/> |

Have you ever had a low-back surgery?

- Yes, one surgery  
 Yes, more than one surgery  
 No

**If yes, when was your last low-back surgery?**

- Less than 6 months ago
- 6 months or more, but less than 1 year ago
- Between 1 and 2 years ago
- More than 2 years ago

**Did any of your low-back surgeries involve a spinal fusion (also called an arthrodesis)?**

- Yes
- No
- Not sure

**Pain interference**

**In the past 7 days...**

|                                                                                           | Not at all            | A little bit          | Somewhat              | Quite a bit           | Very much             |
|-------------------------------------------------------------------------------------------|-----------------------|-----------------------|-----------------------|-----------------------|-----------------------|
| How much did pain interfere with your day-to-day activities?                              | <input type="radio"/> | <input type="radio"/> | <input type="radio"/> | <input type="radio"/> | <input type="radio"/> |
| How much did pain interfere with work around the home (e.g., garden work, renovations)?   | <input type="radio"/> | <input type="radio"/> | <input type="radio"/> | <input type="radio"/> | <input type="radio"/> |
| How much did pain interfere with your ability to participate in social activities?        | <input type="radio"/> | <input type="radio"/> | <input type="radio"/> | <input type="radio"/> | <input type="radio"/> |
| How much did pain interfere with your household chores (e.g., house cleaning, vacuuming)? | <input type="radio"/> | <input type="radio"/> | <input type="radio"/> | <input type="radio"/> | <input type="radio"/> |

Have you used any of the following treatments for your low-back pain?

|                                                                                                                                                        | Yes, I am currently using this treatment | Yes, I have used this treatment in the past but stopped | No                    | Not sure              |
|--------------------------------------------------------------------------------------------------------------------------------------------------------|------------------------------------------|---------------------------------------------------------|-----------------------|-----------------------|
| Opioid painkillers (prescription medications such as Codeine, Dilaudid, Duragesic, Fentanyl, Hydromorphone, Methadone, Morphine, Oxycodone, Tramadol)? | <input type="radio"/>                    | <input type="radio"/>                                   | <input type="radio"/> | <input type="radio"/> |
| Infiltrations/Injections (such as epidural steroid injections, facet injections)                                                                       | <input type="radio"/>                    | <input type="radio"/>                                   | <input type="radio"/> | <input type="radio"/> |
| Exercise therapy                                                                                                                                       | <input type="radio"/>                    | <input type="radio"/>                                   | <input type="radio"/> | <input type="radio"/> |
| Psychological counseling (such as cognitive-behavioral therapy)                                                                                        | <input type="radio"/>                    | <input type="radio"/>                                   | <input type="radio"/> | <input type="radio"/> |

The next two questions are for people who normally work outside the home

|                                                                                                                             | Yes                   | No                    | Does not apply        |
|-----------------------------------------------------------------------------------------------------------------------------|-----------------------|-----------------------|-----------------------|
| I have been off work or unemployed for 1 month or more due to low-back pain                                                 | <input type="radio"/> | <input type="radio"/> | <input type="radio"/> |
| I receive or have applied for disability or workers' compensation benefits because I am unable to work due to low-back pain | <input type="radio"/> | <input type="radio"/> | <input type="radio"/> |

Physical Function

|                                                           | Without any difficulty | With a little difficulty | With some difficulty  | With much difficulty  | Unable to do          |
|-----------------------------------------------------------|------------------------|--------------------------|-----------------------|-----------------------|-----------------------|
| Are you able to do chores such as vacuuming or yard work? | <input type="radio"/>  | <input type="radio"/>    | <input type="radio"/> | <input type="radio"/> | <input type="radio"/> |
| Are you able to go up and down stairs at a normal pace?   | <input type="radio"/>  | <input type="radio"/>    | <input type="radio"/> | <input type="radio"/> | <input type="radio"/> |
| Are you able to go for a walk of at least 15 minutes?     | <input type="radio"/>  | <input type="radio"/>    | <input type="radio"/> | <input type="radio"/> | <input type="radio"/> |
| Are you able to run errands and shop?                     | <input type="radio"/>  | <input type="radio"/>    | <input type="radio"/> | <input type="radio"/> | <input type="radio"/> |

## Depression

In the past 7 days...

|                  | Never                 | Rarely                | Sometimes             | Often                 | Always                |
|------------------|-----------------------|-----------------------|-----------------------|-----------------------|-----------------------|
| I felt worthless | <input type="radio"/> | <input type="radio"/> | <input type="radio"/> | <input type="radio"/> | <input type="radio"/> |
| I felt helpless  | <input type="radio"/> | <input type="radio"/> | <input type="radio"/> | <input type="radio"/> | <input type="radio"/> |
| I felt depressed | <input type="radio"/> | <input type="radio"/> | <input type="radio"/> | <input type="radio"/> | <input type="radio"/> |
| I felt hopeless  | <input type="radio"/> | <input type="radio"/> | <input type="radio"/> | <input type="radio"/> | <input type="radio"/> |

## Sleep disturbance

In the past 7 days...

|                      | Very poor             | Poor                  | Fair                  | Good                  | Very good             |
|----------------------|-----------------------|-----------------------|-----------------------|-----------------------|-----------------------|
| My sleep quality was | <input type="radio"/> | <input type="radio"/> | <input type="radio"/> | <input type="radio"/> | <input type="radio"/> |

In the past 7 days...

|                         | Not at all            | A little bit          | Somewhat              | Quite a bit           | Very much             |
|-------------------------|-----------------------|-----------------------|-----------------------|-----------------------|-----------------------|
| My sleep was refreshing | <input type="radio"/> | <input type="radio"/> | <input type="radio"/> | <input type="radio"/> | <input type="radio"/> |

In the past 7 days...

|                                 | Not at all            | A little bit          | Somewhat              | Quite a bit           | Very much             |
|---------------------------------|-----------------------|-----------------------|-----------------------|-----------------------|-----------------------|
| I had a problem with my sleep   | <input type="radio"/> | <input type="radio"/> | <input type="radio"/> | <input type="radio"/> | <input type="radio"/> |
| I had difficulty falling asleep | <input type="radio"/> | <input type="radio"/> | <input type="radio"/> | <input type="radio"/> | <input type="radio"/> |

It's not really safe for a person with my low-back problem to be physically active.

- Agree
- Disagree

I feel that my low-back pain is terrible and it's never going to get any better.

- Agree
- Disagree

Are you involved in a lawsuit or legal claim related to your low-back problem?

- Yes
- No
- Not sure

In the past year...

|                                                                              | Never                 | Rarely                | Sometimes             | Often                 |
|------------------------------------------------------------------------------|-----------------------|-----------------------|-----------------------|-----------------------|
| Have you consumed alcohol or used drugs more than you meant to?              | <input type="radio"/> | <input type="radio"/> | <input type="radio"/> | <input type="radio"/> |
| Have you felt you wanted or needed to cut down on your drinking or drug use? | <input type="radio"/> | <input type="radio"/> | <input type="radio"/> | <input type="radio"/> |

Age (0-120 years) :

Gender :

- Female
- Male
- Unknown
- Unspecified

Racial, ethnic or cultural origins (mark more than one answer if applicable):

Are you an Aboriginal person, that is, First Nations, Métis or Inuk (Inuit)?

- No, not an Aboriginal person
- Yes, First Nations - North American Indian
- Yes, Métis
- Yes, Inuk (Inuit)



**Are you?**

- White
- South Asian - e.g., East Indian, Pakistani, Sri Lankan
- Chinese
- Black
- Filipino
- Latin American
- Arab
- Southeast Asian - e.g., Vietnamese, Cambodian, Malaysian, Laotian
- West Asian - e.g., Iranian, Afghan
- Korean
- Japanese
- Autre :

(please specify)

**Employment status (mark more than one answer if applicable):**

- Working now full-time
- Working now part-time
- Looking for work, unemployed
- Sick leave or maternity leave
- Disabled due to back pain, permanently or temporarily
- Disabled for reasons other than back pain
- Student
- Temporarily laid off
- Retired
- Keeping house
- Unknown
- Other:

(please specify)

Education level (select the highest level attained):

- No high school diploma
- High school (secondary school) diploma or equivalent
- Registered apprenticeship or other trades certificate or diploma (e.g., hairstyling, cooking, electrician, carpentry, etc.)
- College, CEGEP or other non-university certificate or diploma (e.g., accounting technology, industrial engineering technology, legal assistant, pre-university program, etc.)
- University certificate or diploma below bachelor's level (e.g., undergraduate certificate)
- Bachelor's degree (e.g., B.A., B.A. (Hons.), B.Sc., B.Ed., LL.B.)
- University certificate or diploma above bachelor's level (e.g., D.E.S.S., Short Graduate Program )
- Master's degree (e.g., M.A., M.Sc., M.Ed., M.B.A.)
- Degree in medicine, dentistry, veterinary medicine or optometry (M.D., D.D.S., D.M.D., D.V.M., O.D.)
- Doctorate (e.g., Ph.D., Psy.D, Ed.D.)

How would you describe your cigarette smoking?

- Never smoked
- Current smoker
- Used to smoke, but have now quit

Height:

In feet/inches (e.g., 5'6) :

**OR**

In centimeters (cm) :

Weight:

In pounds (lbs) :

**OR**

In kilograms (kg) :
